# Supplementary material for: Association of Preterm Births Among US Latina Women With the 2016 Presidential Election
Source: PubMed Central journal article supplement (PMC6647358; doi:10.1001/jamanetworkopen.2019.7084), 2019-07-19
Supplement: jamanetwopen-2-e197084-s001.pdf [file jamanetwopen-2-e197084-s001.pdf]

## Supplementary Online Content

Gemmill A, Catalano R, Casey JA, et al. Association of preterm births among US Latina women with the 2016 presidential election. *JAMA Netw Open*. 2019;2(7):e197084. doi:10.1001/jamanetworkopen.2019.7084

**eMethods 1.** Data Analysis

**eMethods 2.** Statistical Code and Output

**eTable 1.** Estimated Parameters for Step 1 Regressions and Step 2 Transfer Functions for Monthly Male and Female Preterm Births to Latina Women in the United States for the First 94 Months of the Obama Presidency

**eTable 2.** Estimated Parameters for Regressions of Male and Female Preterm Births to Latina Women on the Presidential Election of November 2016

**eTable 3.** Estimated Parameters for Full Transfer Functions for Monthly Male and Female Preterm Births to Latina Women in the United States for the 103 Months Beginning January 2009

**eReferences.**

This supplementary material has been provided by the authors to give readers additional information about their work.

## eMethods. Data Analysis

Step 1 We regressed the monthly number of preterm male and, separately, female births to Latina women for the 94 months before the 2016 election (i.e., the Obama environment) on the monthly number of *term* births to Latina women in the same month as preterm births (i.e., month  $t$ ) as well as in the two months *after* (i.e., month  $t+1$  and  $t+2$ ), and on the monthly number of preterm births among non-Latina women at month  $t$ . All 3 birth count variables exhibited strong seasonality and were, consistent with convention,<sup>1</sup> differenced at 12 months (i.e., the number of births at month  $t$  subtracted from those at month  $t+12$ ) to remove seasonality. We specified the regressions as follows.

$$\Delta^{12}Y_t = C + \beta_0\Delta^{12}X_{1t} + \beta_1\Delta^{12}X_{1t+1} + \beta_2\Delta^{12}X_{1t+2} + \beta_3\Delta^{12}X_{2t} + e_t$$

In which  $Y_t$  is the differenced monthly number of preterm male or female births to Latina women in the U.S.  $\Delta^{12}$  is the “difference operator” that indicates  $Y$ ,  $X_1$ , and  $X_2$  at  $t$  were subtracted from  $Y$ ,  $X_1$ , and  $X_2$  at  $t-12$  to remove seasonality from the series.  $C$  is a constant.  $\beta_0$  through  $\beta_3$  are estimated regression coefficients shown in **eTable 1** below.  $X_{1t}$  is the monthly number of term male or female births to Latina women in the U.S.  $X_{2t}$  is the monthly number of male or female preterm births to non-Latina women in the U.S.  $e$  is the error term at month  $t$ .

Step 2 We used Box and Jenkins methods<sup>1</sup> to detect autocorrelation including trends, cycles (e.g. seasonality), and/or the tendency to remain temporarily elevated or depressed after high or low values in the residuals of the sex-specific models estimated in step 1. We converted the models estimated in step 1 to Box-Jenkins transfer functions that included parameters that specify any autocorrelation detected in step 2. The general form of the transfer functions were as follows.

$$\Delta^{12}Y_t = C + \beta_0\Delta^{12}X_{1t} + \beta_1\Delta^{12}X_{1t+1} + \beta_2\Delta^{12}X_{1t+2} + \beta_3\Delta^{12}X_{2t} + (1-\theta B^q)/(1-\phi B^p)\alpha_t$$

In which  $Y$ ,  $X_1$ ,  $X_2$ , and  $\Delta^{12}$  are as defined above.  $\beta_0$  through  $\beta_3$  are estimated coefficients shown in **eTable 1** below.  $\phi$  is an autoregressive coefficient that expresses the tendency of  $Y$  to remain elevated or depressed after high or low values.  $B$  is the “backshift operator” or value of  $\alpha$  at  $t-p$  or  $t-q$ .  $\theta$  is a moving average coefficient that expresses the proportion of  $\alpha$  at time  $t-1$  carried into time  $t$ .  $\alpha_t$  is the error term at month  $t$ .

Step 3 We applied the transfer functions devised in step 2 (i.e., those estimated for the 94 Obama era months) to 103 months ending July 2017 to estimate counterfactuals for the 9 birth cohorts in gestation at the election (i.e. those born from November 2016 through July 2017). We fixed the coefficients in the transfer functions to those estimated in step 2 for the 94 Obama era months. The counterfactuals and observed values appear in **Figure 1** of the main text. The argument that the Trump election increased preterm birth among Latinas implies that the mean of the last 9 residuals of this model (i.e., the observed values less the counterfactual values for months 95 through 103) will significantly exceed the mean of all 103 residuals.

Step 4 To determine if the mean of the last 9 residuals of the model estimated in step 3 differed significantly from the mean of all 103 residuals, we regressed the 103 residuals from the transfer function estimated in step 3 on an exposure variable scored 1 for November through July 2016 and 0 otherwise. The results, as described in the main text, were as follows.

$$\text{Males: } \alpha_{mt} = -1.28 + 149.14X_t + e_t$$

$$\text{Females: } \alpha_{ft} = 0.19 + 110.58X_t + e_t$$

Standard errors for the coefficients on X were 31.02 and 25.02 respectively for males and females. Standard errors for the constants were 9.8 for males and 7.92 for females. The error terms for both regressions had means of 0, constant variance, and exhibited no autocorrelation.

Critical Period Exploration As noted in the main text, we explored birth cohort-specific associations with the election to detect plausible “critical periods” in pregnancy. We regressed the 103 residuals estimated in step 3 on an “election indicator” variable scored 1 for November 2016 and 0 otherwise. The binary variable was specified in the synchronous configuration in which preterm births and the election indicator variable were in the same month, as well as in 8 configurations in which the election preceded births by 1 through 8 months. The results of this regression appear in **eTable 2** below and in **Figure 2** of the main text.

Alternative Tests We conducted two additional tests, as described in the main text, to determine how sensitive our results were to analytic approach. In the first, we proceeded through steps 1 and 2 above but used all 103 monthly test cohorts. We then expanded the transfer function estimated in step 2 to include the binary election variable. This model provided estimates of the unique contribution of all the independent variables described above to temporal variation in sex-specific preterm births to Latina women. **eTable 3** shows the results of this estimation. We infer support for our hypothesis given that the coefficients for the election variable significantly exceed 0 for males (177.80; standard error = 41.73) as well as females (112.77; standard error = 27.82).

In a second robustness check, we again implemented the first two steps described above for all 103 cohorts but then used the methods of Chang, Tiao, and Chen to detect segments of the residuals that formed not only level shifts such as those we hypothesized, but also changes in slope, as well as spike-and-decay sequences.<sup>2</sup> Given the exploratory nature of this approach, we set significance as segments likely to occur by chance once in 100 experiments. Our theory implies a level shift at or near the election. The Chang, Tiao, and Chen method detected an upward level shift among males born to Latina women that included the months August 2016 through July 2017. An upward level shift including October 2016 through July 2017 appeared for females. Other detected segments included 4 decaying spikes for males (down in May 2012 and March 2013; up in October 2012 and November 2013) and one decaying spike (down in March 2014) for females. No slope changes appeared for either sex.

## eMethods 2. Statistical Code and Output

THE PC SCA STATISTICAL SYSTEM ( Release 5.2-Enterprise )

COPYRIGHT 1985-1998, SCIENTIFIC COMPUTING ASSOCIATES. ALL RIGHTS RESERVED  
SCA PRODUCT IDENTIFICATION: UTS & EXPERT (GSA OPTIONAL)  
SCA SOFTWARE IDENTIFICATION: UC-BERKELEY.NETW ( 98110618 )  
RELEASE DATE: 9/ 1/97

SIZE OF WORKSPACE IS 999000 SINGLE PRECISION WORDS  
DATE -- 2/ 2/\*\* TIME -- 23:48:24  
--

Input year,month,@  
dsfall,nsfall,dsfhisp,nsfhisp,@  
dsmall,nsmall,dsmhisp,nsmhisp

YEAR , A 132 BY 1 VARIABLE, IS STORED IN THE WORKSPACE  
MONTH , A 132 BY 1 VARIABLE, IS STORED IN THE WORKSPACE  
DSFALL , A 132 BY 1 VARIABLE, IS STORED IN THE WORKSPACE  
NSFALL , A 132 BY 1 VARIABLE, IS STORED IN THE WORKSPACE  
DSFHISP , A 132 BY 1 VARIABLE, IS STORED IN THE WORKSPACE  
NSFHISP , A 132 BY 1 VARIABLE, IS STORED IN THE WORKSPACE  
DSMALL , A 132 BY 1 VARIABLE, IS STORED IN THE WORKSPACE  
NSMALL , A 132 BY 1 VARIABLE, IS STORED IN THE WORKSPACE  
DSMHISP , A 132 BY 1 VARIABLE, IS STORED IN THE WORKSPACE  
NSMHISP , A 132 BY 1 VARIABLE, IS STORED IN THE WORKSPACE  
--

Pro out brief.

PROFILE OF THE CURRENT SESSION:

STYLE OF THIS SESSION . . . PARTIAL  
PROMPTING OF THIS SESSION . . . NORMAL  
ECHO OF THE INSTRUCTION . . . YES  
LEVEL OF OUTPUT . . . . . BRIEF  
COMPUTATION PRECISION . . . SINGLE  
FILE FOR INSTRUCTIONS . . . 6  
FILE FOR OUTPUT . . . . . 10  
WIDTH OF INPUT DEVICE . . . 72  
WIDTH OF OUTPUT DEVICE. . . 80  
--

Workspace compressed. Novar 1000

THE WORKSPACE IS COMPRESSED  
THE MAXIMUM NUMBER OF VARIABLES IS EXPANDED TO1018  
--

Sel old year,month,dsfall,nsfall,dsfhisp,@  
nsfhisp,dsmall,nsmall,dsmhisp,nsmhisp.@  
new years,months,dsfalls,nsfalls,dsfhisps,@  
nsfhisps,dsmalls,nsmalls,dsmhisps,nsmhisps.@  
span (25,127)

```
VARIABLE YEAR IS EDITED, THE RESULT IS STORED IN VARIABLE YEARS
VARIABLE YEARS IS A 103 BY 1 MATRIX
VARIABLE MONTH IS EDITED, THE RESULT IS STORED IN VARIABLE MONTHS
VARIABLE MONTHS IS A 103 BY 1 MATRIX
VARIABLE DSFALL IS EDITED, THE RESULT IS STORED IN VARIABLE DSFALLS
VARIABLE DSFALLS IS A 103 BY 1 MATRIX
VARIABLE NSFALL IS EDITED, THE RESULT IS STORED IN VARIABLE NSFALLS
VARIABLE NSFALLS IS A 103 BY 1 MATRIX
VARIABLE DSFHISP IS EDITED, THE RESULT IS STORED IN VARIABLE DSFHISPS
VARIABLE DSFHISPS IS A 103 BY 1 MATRIX
VARIABLE NSFHISP IS EDITED, THE RESULT IS STORED IN VARIABLE NSFHISPS
VARIABLE NSFHISPS IS A 103 BY 1 MATRIX
VARIABLE DSMALL IS EDITED, THE RESULT IS STORED IN VARIABLE DSMALLS
VARIABLE DSMALLS IS A 103 BY 1 MATRIX
VARIABLE NSMALL IS EDITED, THE RESULT IS STORED IN VARIABLE NSMALLS
VARIABLE NSMALLS IS A 103 BY 1 MATRIX
VARIABLE DSMHISP IS EDITED, THE RESULT IS STORED IN VARIABLE DSMHISPS
VARIABLE DSMHISPS IS A 103 BY 1 MATRIX
VARIABLE NSMHISP IS EDITED, THE RESULT IS STORED IN VARIABLE NSMHISPS
VARIABLE NSMHISPS IS A 103 BY 1 MATRIX
--
```

```
nov16=years-years
--
```

```
Nov16(95)=1
--
```

```
n16step=nov16
--
```

```
n16step(96)=1
--
```

```
n16step(97)=1
--
```

```
n16step(98)=1
--
```

```
n16step(99)=1
--
```

```
n16step(100)=1
--
```

```
n16step(101)=1
--
```

```
n16step(102)=1
--
```

n16step(103)=1

--

prin years,months,nov16,n16step

|         |    |   |     |    |   |          |
|---------|----|---|-----|----|---|----------|
| YEARS   | IS | A | 103 | BY | 1 | VARIABLE |
| MONTHS  | IS | A | 103 | BY | 1 | VARIABLE |
| NOV16   | IS | A | 103 | BY | 1 | VARIABLE |
| N16STEP | IS | A | 103 | BY | 1 | VARIABLE |

| VARIABLE  | YEARS    | MONTHS | NOV16 | N16STEP |
|-----------|----------|--------|-------|---------|
| COLUMN--> | 1        | 1      | 1     | 1       |
| ROW       |          |        |       |         |
| 1         | 2009.000 | 1.000  | .000  | .000    |
| 2         | 2009.000 | 2.000  | .000  | .000    |
| 3         | 2009.000 | 3.000  | .000  | .000    |
| 4         | 2009.000 | 4.000  | .000  | .000    |
| 5         | 2009.000 | 5.000  | .000  | .000    |
| 6         | 2009.000 | 6.000  | .000  | .000    |
| 7         | 2009.000 | 7.000  | .000  | .000    |
| 8         | 2009.000 | 8.000  | .000  | .000    |
| 9         | 2009.000 | 9.000  | .000  | .000    |
| 10        | 2009.000 | 10.000 | .000  | .000    |
| 11        | 2009.000 | 11.000 | .000  | .000    |
| 12        | 2009.000 | 12.000 | .000  | .000    |
| 13        | 2010.000 | 1.000  | .000  | .000    |
| 14        | 2010.000 | 2.000  | .000  | .000    |
| 15        | 2010.000 | 3.000  | .000  | .000    |
| 16        | 2010.000 | 4.000  | .000  | .000    |
| 17        | 2010.000 | 5.000  | .000  | .000    |
| 18        | 2010.000 | 6.000  | .000  | .000    |
| 19        | 2010.000 | 7.000  | .000  | .000    |
| 20        | 2010.000 | 8.000  | .000  | .000    |
| 21        | 2010.000 | 9.000  | .000  | .000    |
| 22        | 2010.000 | 10.000 | .000  | .000    |
| 23        | 2010.000 | 11.000 | .000  | .000    |
| 24        | 2010.000 | 12.000 | .000  | .000    |
| 25        | 2011.000 | 1.000  | .000  | .000    |
| 26        | 2011.000 | 2.000  | .000  | .000    |
| 27        | 2011.000 | 3.000  | .000  | .000    |
| 28        | 2011.000 | 4.000  | .000  | .000    |
| 29        | 2011.000 | 5.000  | .000  | .000    |
| 30        | 2011.000 | 6.000  | .000  | .000    |
| 31        | 2011.000 | 7.000  | .000  | .000    |
| 32        | 2011.000 | 8.000  | .000  | .000    |
| 33        | 2011.000 | 9.000  | .000  | .000    |
| 34        | 2011.000 | 10.000 | .000  | .000    |
| 35        | 2011.000 | 11.000 | .000  | .000    |
| 36        | 2011.000 | 12.000 | .000  | .000    |
| 37        | 2012.000 | 1.000  | .000  | .000    |
| 38        | 2012.000 | 2.000  | .000  | .000    |
| 39        | 2012.000 | 3.000  | .000  | .000    |
| 40        | 2012.000 | 4.000  | .000  | .000    |
| 41        | 2012.000 | 5.000  | .000  | .000    |
| 42        | 2012.000 | 6.000  | .000  | .000    |
| 43        | 2012.000 | 7.000  | .000  | .000    |
| 44        | 2012.000 | 8.000  | .000  | .000    |
| 45        | 2012.000 | 9.000  | .000  | .000    |
| 46        | 2012.000 | 10.000 | .000  | .000    |
| 47        | 2012.000 | 11.000 | .000  | .000    |
| 48        | 2012.000 | 12.000 | .000  | .000    |



|     |          |        |       |       |
|-----|----------|--------|-------|-------|
| 49  | 2013.000 | 1.000  | .000  | .000  |
| 50  | 2013.000 | 2.000  | .000  | .000  |
| 51  | 2013.000 | 3.000  | .000  | .000  |
| 52  | 2013.000 | 4.000  | .000  | .000  |
| 53  | 2013.000 | 5.000  | .000  | .000  |
| 54  | 2013.000 | 6.000  | .000  | .000  |
| 55  | 2013.000 | 7.000  | .000  | .000  |
| 56  | 2013.000 | 8.000  | .000  | .000  |
| 57  | 2013.000 | 9.000  | .000  | .000  |
| 58  | 2013.000 | 10.000 | .000  | .000  |
| 59  | 2013.000 | 11.000 | .000  | .000  |
| 60  | 2013.000 | 12.000 | .000  | .000  |
| 61  | 2014.000 | 1.000  | .000  | .000  |
| 62  | 2014.000 | 2.000  | .000  | .000  |
| 63  | 2014.000 | 3.000  | .000  | .000  |
| 64  | 2014.000 | 4.000  | .000  | .000  |
| 65  | 2014.000 | 5.000  | .000  | .000  |
| 66  | 2014.000 | 6.000  | .000  | .000  |
| 67  | 2014.000 | 7.000  | .000  | .000  |
| 68  | 2014.000 | 8.000  | .000  | .000  |
| 69  | 2014.000 | 9.000  | .000  | .000  |
| 70  | 2014.000 | 10.000 | .000  | .000  |
| 71  | 2014.000 | 11.000 | .000  | .000  |
| 72  | 2014.000 | 12.000 | .000  | .000  |
| 73  | 2015.000 | 1.000  | .000  | .000  |
| 74  | 2015.000 | 2.000  | .000  | .000  |
| 75  | 2015.000 | 3.000  | .000  | .000  |
| 76  | 2015.000 | 4.000  | .000  | .000  |
| 77  | 2015.000 | 5.000  | .000  | .000  |
| 78  | 2015.000 | 6.000  | .000  | .000  |
| 79  | 2015.000 | 7.000  | .000  | .000  |
| 80  | 2015.000 | 8.000  | .000  | .000  |
| 81  | 2015.000 | 9.000  | .000  | .000  |
| 82  | 2015.000 | 10.000 | .000  | .000  |
| 83  | 2015.000 | 11.000 | .000  | .000  |
| 84  | 2015.000 | 12.000 | .000  | .000  |
| 85  | 2016.000 | 1.000  | .000  | .000  |
| 86  | 2016.000 | 2.000  | .000  | .000  |
| 87  | 2016.000 | 3.000  | .000  | .000  |
| 88  | 2016.000 | 4.000  | .000  | .000  |
| 89  | 2016.000 | 5.000  | .000  | .000  |
| 90  | 2016.000 | 6.000  | .000  | .000  |
| 91  | 2016.000 | 7.000  | .000  | .000  |
| 92  | 2016.000 | 8.000  | .000  | .000  |
| 93  | 2016.000 | 9.000  | .000  | .000  |
| 94  | 2016.000 | 10.000 | .000  | .000  |
| 95  | 2016.000 | 11.000 | 1.000 | 1.000 |
| 96  | 2016.000 | 12.000 | .000  | 1.000 |
| 97  | 2017.000 | 1.000  | .000  | 1.000 |
| 98  | 2017.000 | 2.000  | .000  | 1.000 |
| 99  | 2017.000 | 3.000  | .000  | 1.000 |
| 100 | 2017.000 | 4.000  | .000  | 1.000 |
| 101 | 2017.000 | 5.000  | .000  | 1.000 |
| 102 | 2017.000 | 6.000  | .000  | 1.000 |
| 103 | 2017.000 | 7.000  | .000  | 1.000 |

--

PSHis=nsmhisps+nsfhisps

--

Step1=nsfalls+nsmalls

```

--

PSNHIS=step1-pshis
--

TSHIS=dsfhisps+dsmhisps
--

TSHISa=dsfhisps+dsmhisps
--

Psmhis=nsmhisps
--

psmnh=nsmalls-psmhis
--

psfhis=nsfhisps
--

psfnh=nsfalls-psfhis
--

tsmhis=dsmhisps
--

tsmhisa=dsmhisps
--

tsfhis=dsfhisps
--

tsfhisa=dsfhisps
--

sel old tsmhisa,tsfhisa,tshisa.@
new tsmhis1,tsfhis1,tshis1. Span (26,128)

VARIABLE TSMHISA IS EDITED, THE RESULT IS STORED IN VARIABLE TSMHIS1
VARIABLE TSMHIS1 IS A 103 BY 1 MATRIX
VARIABLE TSFHISA IS EDITED, THE RESULT IS STORED IN VARIABLE TSFHIS1
VARIABLE TSFHIS1 IS A 103 BY 1 MATRIX
VARIABLE TSHISA IS EDITED, THE RESULT IS STORED IN VARIABLE TSHIS1
VARIABLE TSHIS1 IS A 103 BY 1 MATRIX
--

sel old tsmhisa,tsfhisa,tshisa.@
new tsmhis2,tsfhis2,tshis2. Span (27,129)

VARIABLE TSMHISA IS EDITED, THE RESULT IS STORED IN VARIABLE TSMHIS2

```

```

VARIABLE TSMHIS2 IS A 103 BY 1 MATRIX
VARIABLE TSFHISA IS EDITED, THE RESULT IS STORED IN VARIABLE TSFHIS2
VARIABLE TSFHIS2 IS A 103 BY 1 MATRIX
VARIABLE TSHISA IS EDITED, THE RESULT IS STORED IN VARIABLE TSHIS2
VARIABLE TSHIS2 IS A 103 BY 1 MATRIX
--

```

```

prin nov16,tshis,tshis1,tshis2

```

```

NOV16 IS A 103 BY 1 VARIABLE
TSHIS IS A 103 BY 1 VARIABLE
TSHIS1 IS A 103 BY 1 VARIABLE
TSHIS2 IS A 103 BY 1 VARIABLE

```

| VARIABLE<br>COLUMN--> | NOV16<br>1 | TSHIS<br>1 | TSHIS1<br>1 | TSHIS2<br>1 |
|-----------------------|------------|------------|-------------|-------------|
| ROW                   |            |            |             |             |
| 1                     | .000       | 82043.000  | 74331.000   | 80369.000   |
| 2                     | .000       | 74331.000  | 80369.000   | 77249.000   |
| 3                     | .000       | 80369.000  | 77249.000   | 80046.000   |
| 4                     | .000       | 77249.000  | 80046.000   | 81471.000   |
| 5                     | .000       | 80046.000  | 81471.000   | 87418.000   |
| 6                     | .000       | 81471.000  | 87418.000   | 86838.000   |
| 7                     | .000       | 87418.000  | 86838.000   | 86514.000   |
| 8                     | .000       | 86838.000  | 86514.000   | 82312.000   |
| 9                     | .000       | 86514.000  | 82312.000   | 76246.000   |
| 10                    | .000       | 82312.000  | 76246.000   | 79986.000   |
| 11                    | .000       | 76246.000  | 79986.000   | 76611.000   |
| 12                    | .000       | 79986.000  | 76611.000   | 69403.000   |
| 13                    | .000       | 76611.000  | 69403.000   | 76418.000   |
| 14                    | .000       | 69403.000  | 76418.000   | 72605.000   |
| 15                    | .000       | 76418.000  | 72605.000   | 73894.000   |
| 16                    | .000       | 72605.000  | 73894.000   | 75228.000   |
| 17                    | .000       | 73894.000  | 75228.000   | 79666.000   |
| 18                    | .000       | 75228.000  | 79666.000   | 81956.000   |
| 19                    | .000       | 79666.000  | 81956.000   | 81897.000   |
| 20                    | .000       | 81956.000  | 81897.000   | 78406.000   |
| 21                    | .000       | 81897.000  | 78406.000   | 76150.000   |
| 22                    | .000       | 78406.000  | 76150.000   | 79031.000   |
| 23                    | .000       | 76150.000  | 79031.000   | 74609.000   |
| 24                    | .000       | 79031.000  | 74609.000   | 67912.000   |
| 25                    | .000       | 74609.000  | 67912.000   | 73713.000   |
| 26                    | .000       | 67912.000  | 73713.000   | 69578.000   |
| 27                    | .000       | 73713.000  | 69578.000   | 72602.000   |
| 28                    | .000       | 69578.000  | 72602.000   | 75148.000   |
| 29                    | .000       | 72602.000  | 75148.000   | 77988.000   |
| 30                    | .000       | 75148.000  | 77988.000   | 81848.000   |
| 31                    | .000       | 77988.000  | 81848.000   | 79186.000   |
| 32                    | .000       | 81848.000  | 79186.000   | 74760.000   |
| 33                    | .000       | 79186.000  | 74760.000   | 73196.000   |
| 34                    | .000       | 74760.000  | 73196.000   | 74626.000   |
| 35                    | .000       | 73196.000  | 74626.000   | 72585.000   |
| 36                    | .000       | 74626.000  | 72585.000   | 67882.000   |
| 37                    | .000       | 72585.000  | 67882.000   | 71769.000   |
| 38                    | .000       | 67882.000  | 71769.000   | 66814.000   |
| 39                    | .000       | 71769.000  | 66814.000   | 71690.000   |
| 40                    | .000       | 66814.000  | 71690.000   | 72667.000   |
| 41                    | .000       | 71690.000  | 72667.000   | 78536.000   |
| 42                    | .000       | 72667.000  | 78536.000   | 81910.000   |
| 43                    | .000       | 78536.000  | 81910.000   | 78027.000   |
| 44                    | .000       | 81910.000  | 78027.000   | 77346.000   |

|     |       |           |           |           |
|-----|-------|-----------|-----------|-----------|
| 45  | .000  | 78027.000 | 77346.000 | 73010.000 |
| 46  | .000  | 77346.000 | 73010.000 | 73281.000 |
| 47  | .000  | 73010.000 | 73281.000 | 73172.000 |
| 48  | .000  | 73281.000 | 73172.000 | 64785.000 |
| 49  | .000  | 73172.000 | 64785.000 | 69786.000 |
| 50  | .000  | 64785.000 | 69786.000 | 67505.000 |
| 51  | .000  | 69786.000 | 67505.000 | 71762.000 |
| 52  | .000  | 67505.000 | 71762.000 | 70495.000 |
| 53  | .000  | 71762.000 | 70495.000 | 77879.000 |
| 54  | .000  | 70495.000 | 77879.000 | 79946.000 |
| 55  | .000  | 77879.000 | 79946.000 | 77637.000 |
| 56  | .000  | 79946.000 | 77637.000 | 76700.000 |
| 57  | .000  | 77637.000 | 76700.000 | 72359.000 |
| 58  | .000  | 76700.000 | 72359.000 | 75977.000 |
| 59  | .000  | 72359.000 | 75977.000 | 73886.000 |
| 60  | .000  | 75977.000 | 73886.000 | 65872.000 |
| 61  | .000  | 73886.000 | 65872.000 | 70755.000 |
| 62  | .000  | 65872.000 | 70755.000 | 68848.000 |
| 63  | .000  | 70755.000 | 68848.000 | 72477.000 |
| 64  | .000  | 68848.000 | 72477.000 | 71944.000 |
| 65  | .000  | 72477.000 | 71944.000 | 79304.000 |
| 66  | .000  | 71944.000 | 79304.000 | 80235.000 |
| 67  | .000  | 79304.000 | 80235.000 | 80138.000 |
| 68  | .000  | 80235.000 | 80138.000 | 77463.000 |
| 69  | .000  | 80138.000 | 77463.000 | 72564.000 |
| 70  | .000  | 77463.000 | 72564.000 | 77097.000 |
| 71  | .000  | 72564.000 | 77097.000 | 74037.000 |
| 72  | .000  | 77097.000 | 74037.000 | 67293.000 |
| 73  | .000  | 74037.000 | 67293.000 | 72885.000 |
| 74  | .000  | 67293.000 | 72885.000 | 70295.000 |
| 75  | .000  | 72885.000 | 70295.000 | 72265.000 |
| 76  | .000  | 70295.000 | 72265.000 | 73530.000 |
| 77  | .000  | 72265.000 | 73530.000 | 79474.000 |
| 78  | .000  | 73530.000 | 79474.000 | 81239.000 |
| 79  | .000  | 79474.000 | 81239.000 | 80742.000 |
| 80  | .000  | 81239.000 | 80742.000 | 77526.000 |
| 81  | .000  | 80742.000 | 77526.000 | 73336.000 |
| 82  | .000  | 77526.000 | 73336.000 | 77375.000 |
| 83  | .000  | 73336.000 | 77375.000 | 73079.000 |
| 84  | .000  | 77375.000 | 73079.000 | 69007.000 |
| 85  | .000  | 73079.000 | 69007.000 | 72682.000 |
| 86  | .000  | 69007.000 | 72682.000 | 69317.000 |
| 87  | .000  | 72682.000 | 69317.000 | 72337.000 |
| 88  | .000  | 69317.000 | 72337.000 | 73701.000 |
| 89  | .000  | 72337.000 | 73701.000 | 77243.000 |
| 90  | .000  | 73701.000 | 77243.000 | 82122.000 |
| 91  | .000  | 77243.000 | 82122.000 | 80039.000 |
| 92  | .000  | 82122.000 | 80039.000 | 76463.000 |
| 93  | .000  | 80039.000 | 76463.000 | 73388.000 |
| 94  | .000  | 76463.000 | 73388.000 | 75020.000 |
| 95  | 1.000 | 73388.000 | 75020.000 | 72312.000 |
| 96  | .000  | 75020.000 | 72312.000 | 65317.000 |
| 97  | .000  | 72312.000 | 65317.000 | 70995.000 |
| 98  | .000  | 65317.000 | 70995.000 | 66348.000 |
| 99  | .000  | 70995.000 | 66348.000 | 71662.000 |
| 100 | .000  | 66348.000 | 71662.000 | 72366.000 |
| 101 | .000  | 71662.000 | 72366.000 | 76351.000 |
| 102 | .000  | 72366.000 | 76351.000 | 80438.000 |
| 103 | .000  | 76351.000 | 80438.000 | 77804.000 |

--

prin nov16,tsmhis,tsmhis1,tsmhis2

```

NOV16   IS  A   103  BY    1  VARIABLE
TSMHIS  IS  A   103  BY    1  VARIABLE
TSMHIS1 IS  A   103  BY    1  VARIABLE
TSMHIS2 IS  A   103  BY    1  VARIABLE

```

| VARIABLE<br>COLUMN--> | NOV16<br>1 | TSMHIS<br>1 | TSMHIS1<br>1 | TSMHIS2<br>1 |
|-----------------------|------------|-------------|--------------|--------------|
| ROW                   |            |             |              |              |
| 1                     | .000       | 41560.000   | 37834.000    | 41105.000    |
| 2                     | .000       | 37834.000   | 41105.000    | 39509.000    |
| 3                     | .000       | 41105.000   | 39509.000    | 41120.000    |
| 4                     | .000       | 39509.000   | 41120.000    | 41895.000    |
| 5                     | .000       | 41120.000   | 41895.000    | 44597.000    |
| 6                     | .000       | 41895.000   | 44597.000    | 44580.000    |
| 7                     | .000       | 44597.000   | 44580.000    | 44079.000    |
| 8                     | .000       | 44580.000   | 44079.000    | 42130.000    |
| 9                     | .000       | 44079.000   | 42130.000    | 39163.000    |
| 10                    | .000       | 42130.000   | 39163.000    | 40680.000    |
| 11                    | .000       | 39163.000   | 40680.000    | 38874.000    |
| 12                    | .000       | 40680.000   | 38874.000    | 35514.000    |
| 13                    | .000       | 38874.000   | 35514.000    | 38830.000    |
| 14                    | .000       | 35514.000   | 38830.000    | 37044.000    |
| 15                    | .000       | 38830.000   | 37044.000    | 37852.000    |
| 16                    | .000       | 37044.000   | 37852.000    | 38484.000    |
| 17                    | .000       | 37852.000   | 38484.000    | 40614.000    |
| 18                    | .000       | 38484.000   | 40614.000    | 41601.000    |
| 19                    | .000       | 40614.000   | 41601.000    | 41692.000    |
| 20                    | .000       | 41601.000   | 41692.000    | 39837.000    |
| 21                    | .000       | 41692.000   | 39837.000    | 39065.000    |
| 22                    | .000       | 39837.000   | 39065.000    | 40049.000    |
| 23                    | .000       | 39065.000   | 40049.000    | 37849.000    |
| 24                    | .000       | 40049.000   | 37849.000    | 34691.000    |
| 25                    | .000       | 37849.000   | 34691.000    | 37467.000    |
| 26                    | .000       | 34691.000   | 37467.000    | 35788.000    |
| 27                    | .000       | 37467.000   | 35788.000    | 37256.000    |
| 28                    | .000       | 35788.000   | 37256.000    | 38458.000    |
| 29                    | .000       | 37256.000   | 38458.000    | 40109.000    |
| 30                    | .000       | 38458.000   | 40109.000    | 41842.000    |
| 31                    | .000       | 40109.000   | 41842.000    | 40299.000    |
| 32                    | .000       | 41842.000   | 40299.000    | 37858.000    |
| 33                    | .000       | 40299.000   | 37858.000    | 37500.000    |
| 34                    | .000       | 37858.000   | 37500.000    | 37795.000    |
| 35                    | .000       | 37500.000   | 37795.000    | 36697.000    |
| 36                    | .000       | 37795.000   | 36697.000    | 34597.000    |
| 37                    | .000       | 36697.000   | 34597.000    | 36643.000    |
| 38                    | .000       | 34597.000   | 36643.000    | 34174.000    |
| 39                    | .000       | 36643.000   | 34174.000    | 36760.000    |
| 40                    | .000       | 34174.000   | 36760.000    | 37186.000    |
| 41                    | .000       | 36760.000   | 37186.000    | 40202.000    |
| 42                    | .000       | 37186.000   | 40202.000    | 41460.000    |
| 43                    | .000       | 40202.000   | 41460.000    | 39850.000    |
| 44                    | .000       | 41460.000   | 39850.000    | 39401.000    |
| 45                    | .000       | 39850.000   | 39401.000    | 36880.000    |
| 46                    | .000       | 39401.000   | 36880.000    | 37128.000    |
| 47                    | .000       | 36880.000   | 37128.000    | 37137.000    |
| 48                    | .000       | 37128.000   | 37137.000    | 32870.000    |
| 49                    | .000       | 37137.000   | 32870.000    | 35985.000    |
| 50                    | .000       | 32870.000   | 35985.000    | 34546.000    |
| 51                    | .000       | 35985.000   | 34546.000    | 36504.000    |
| 52                    | .000       | 34546.000   | 36504.000    | 36093.000    |
| 53                    | .000       | 36504.000   | 36093.000    | 39906.000    |

```

54      .000 36093.000 39906.000 40721.000
55      .000 39906.000 40721.000 39460.000
56      .000 40721.000 39460.000 39161.000
57      .000 39460.000 39161.000 37109.000
58      .000 39161.000 37109.000 38931.000
59      .000 37109.000 38931.000 37793.000
60      .000 38931.000 37793.000 33760.000
61      .000 37793.000 33760.000 36274.000
62      .000 33760.000 36274.000 35264.000
63      .000 36274.000 35264.000 37000.000
64      .000 35264.000 37000.000 36705.000
65      .000 37000.000 36705.000 40502.000
66      .000 36705.000 40502.000 40978.000
67      .000 40502.000 40978.000 40682.000
68      .000 40978.000 40682.000 39361.000
69      .000 40682.000 39361.000 36929.000
70      .000 39361.000 36929.000 39433.000
71      .000 36929.000 39433.000 37748.000
72      .000 39433.000 37748.000 34274.000
73      .000 37748.000 34274.000 37228.000
74      .000 34274.000 37228.000 36278.000
75      .000 37228.000 36278.000 36892.000
76      .000 36278.000 36892.000 37649.000
77      .000 36892.000 37649.000 40555.000
78      .000 37649.000 40555.000 41457.000
79      .000 40555.000 41457.000 41078.000
80      .000 41457.000 41078.000 39688.000
81      .000 41078.000 39688.000 37413.000
82      .000 39688.000 37413.000 39447.000
83      .000 37413.000 39447.000 37129.000
84      .000 39447.000 37129.000 35190.000
85      .000 37129.000 35190.000 37309.000
86      .000 35190.000 37309.000 35490.000
87      .000 37309.000 35490.000 36990.000
88      .000 35490.000 36990.000 37761.000
89      .000 36990.000 37761.000 39423.000
90      .000 37761.000 39423.000 41710.000
91      .000 39423.000 41710.000 40827.000
92      .000 41710.000 40827.000 39088.000
93      .000 40827.000 39088.000 37482.000
94      .000 39088.000 37482.000 38212.000
95      1.000 37482.000 38212.000 36840.000
96      .000 38212.000 36840.000 33251.000
97      .000 36840.000 33251.000 36168.000
98      .000 33251.000 36168.000 33941.000
99      .000 36168.000 33941.000 36626.000
100     .000 33941.000 36626.000 37108.000
101     .000 36626.000 37108.000 38857.000
102     .000 37108.000 38857.000 41094.000
103     .000 38857.000 41094.000 39556.000
--

```

```
prin nov16,tsfhis,tsfhis1,tsfhis2
```

```

NOV16   IS  A   103  BY    1  VARIABLE
TSFHIS  IS  A   103  BY    1  VARIABLE
TSFHIS1 IS  A   103  BY    1  VARIABLE
TSFHIS2 IS  A   103  BY    1  VARIABLE

```

```

VARIABLE      NOV16      TSFHIS      TSFHIS1      TSFHIS2
COLUMN-->    1          1          1          1

```

| ROW |      |           |           |           |
|-----|------|-----------|-----------|-----------|
| 1   | .000 | 40483.000 | 36497.000 | 39264.000 |
| 2   | .000 | 36497.000 | 39264.000 | 37740.000 |
| 3   | .000 | 39264.000 | 37740.000 | 38926.000 |
| 4   | .000 | 37740.000 | 38926.000 | 39576.000 |
| 5   | .000 | 38926.000 | 39576.000 | 42821.000 |
| 6   | .000 | 39576.000 | 42821.000 | 42258.000 |
| 7   | .000 | 42821.000 | 42258.000 | 42435.000 |
| 8   | .000 | 42258.000 | 42435.000 | 40182.000 |
| 9   | .000 | 42435.000 | 40182.000 | 37083.000 |
| 10  | .000 | 40182.000 | 37083.000 | 39306.000 |
| 11  | .000 | 37083.000 | 39306.000 | 37737.000 |
| 12  | .000 | 39306.000 | 37737.000 | 33889.000 |
| 13  | .000 | 37737.000 | 33889.000 | 37588.000 |
| 14  | .000 | 33889.000 | 37588.000 | 35561.000 |
| 15  | .000 | 37588.000 | 35561.000 | 36042.000 |
| 16  | .000 | 35561.000 | 36042.000 | 36744.000 |
| 17  | .000 | 36042.000 | 36744.000 | 39052.000 |
| 18  | .000 | 36744.000 | 39052.000 | 40355.000 |
| 19  | .000 | 39052.000 | 40355.000 | 40205.000 |
| 20  | .000 | 40355.000 | 40205.000 | 38569.000 |
| 21  | .000 | 40205.000 | 38569.000 | 37085.000 |
| 22  | .000 | 38569.000 | 37085.000 | 38982.000 |
| 23  | .000 | 37085.000 | 38982.000 | 36760.000 |
| 24  | .000 | 38982.000 | 36760.000 | 33221.000 |
| 25  | .000 | 36760.000 | 33221.000 | 36246.000 |
| 26  | .000 | 33221.000 | 36246.000 | 33790.000 |
| 27  | .000 | 36246.000 | 33790.000 | 35346.000 |
| 28  | .000 | 33790.000 | 35346.000 | 36690.000 |
| 29  | .000 | 35346.000 | 36690.000 | 37879.000 |
| 30  | .000 | 36690.000 | 37879.000 | 40006.000 |
| 31  | .000 | 37879.000 | 40006.000 | 38887.000 |
| 32  | .000 | 40006.000 | 38887.000 | 36902.000 |
| 33  | .000 | 38887.000 | 36902.000 | 35696.000 |
| 34  | .000 | 36902.000 | 35696.000 | 36831.000 |
| 35  | .000 | 35696.000 | 36831.000 | 35888.000 |
| 36  | .000 | 36831.000 | 35888.000 | 33285.000 |
| 37  | .000 | 35888.000 | 33285.000 | 35126.000 |
| 38  | .000 | 33285.000 | 35126.000 | 32640.000 |
| 39  | .000 | 35126.000 | 32640.000 | 34930.000 |
| 40  | .000 | 32640.000 | 34930.000 | 35481.000 |
| 41  | .000 | 34930.000 | 35481.000 | 38334.000 |
| 42  | .000 | 35481.000 | 38334.000 | 40450.000 |
| 43  | .000 | 38334.000 | 40450.000 | 38177.000 |
| 44  | .000 | 40450.000 | 38177.000 | 37945.000 |
| 45  | .000 | 38177.000 | 37945.000 | 36130.000 |
| 46  | .000 | 37945.000 | 36130.000 | 36153.000 |
| 47  | .000 | 36130.000 | 36153.000 | 36035.000 |
| 48  | .000 | 36153.000 | 36035.000 | 31915.000 |
| 49  | .000 | 36035.000 | 31915.000 | 33801.000 |
| 50  | .000 | 31915.000 | 33801.000 | 32959.000 |
| 51  | .000 | 33801.000 | 32959.000 | 35258.000 |
| 52  | .000 | 32959.000 | 35258.000 | 34402.000 |
| 53  | .000 | 35258.000 | 34402.000 | 37973.000 |
| 54  | .000 | 34402.000 | 37973.000 | 39225.000 |
| 55  | .000 | 37973.000 | 39225.000 | 38177.000 |
| 56  | .000 | 39225.000 | 38177.000 | 37539.000 |
| 57  | .000 | 38177.000 | 37539.000 | 35250.000 |
| 58  | .000 | 37539.000 | 35250.000 | 37046.000 |
| 59  | .000 | 35250.000 | 37046.000 | 36093.000 |
| 60  | .000 | 37046.000 | 36093.000 | 32112.000 |
| 61  | .000 | 36093.000 | 32112.000 | 34481.000 |
| 62  | .000 | 32112.000 | 34481.000 | 33584.000 |

|     |       |           |           |           |
|-----|-------|-----------|-----------|-----------|
| 63  | .000  | 34481.000 | 33584.000 | 35477.000 |
| 64  | .000  | 33584.000 | 35477.000 | 35239.000 |
| 65  | .000  | 35477.000 | 35239.000 | 38802.000 |
| 66  | .000  | 35239.000 | 38802.000 | 39257.000 |
| 67  | .000  | 38802.000 | 39257.000 | 39456.000 |
| 68  | .000  | 39257.000 | 39456.000 | 38102.000 |
| 69  | .000  | 39456.000 | 38102.000 | 35635.000 |
| 70  | .000  | 38102.000 | 35635.000 | 37664.000 |
| 71  | .000  | 35635.000 | 37664.000 | 36289.000 |
| 72  | .000  | 37664.000 | 36289.000 | 33019.000 |
| 73  | .000  | 36289.000 | 33019.000 | 35657.000 |
| 74  | .000  | 33019.000 | 35657.000 | 34017.000 |
| 75  | .000  | 35657.000 | 34017.000 | 35373.000 |
| 76  | .000  | 34017.000 | 35373.000 | 35881.000 |
| 77  | .000  | 35373.000 | 35881.000 | 38919.000 |
| 78  | .000  | 35881.000 | 38919.000 | 39782.000 |
| 79  | .000  | 38919.000 | 39782.000 | 39664.000 |
| 80  | .000  | 39782.000 | 39664.000 | 37838.000 |
| 81  | .000  | 39664.000 | 37838.000 | 35923.000 |
| 82  | .000  | 37838.000 | 35923.000 | 37928.000 |
| 83  | .000  | 35923.000 | 37928.000 | 35950.000 |
| 84  | .000  | 37928.000 | 35950.000 | 33817.000 |
| 85  | .000  | 35950.000 | 33817.000 | 35373.000 |
| 86  | .000  | 33817.000 | 35373.000 | 33827.000 |
| 87  | .000  | 35373.000 | 33827.000 | 35347.000 |
| 88  | .000  | 33827.000 | 35347.000 | 35940.000 |
| 89  | .000  | 35347.000 | 35940.000 | 37820.000 |
| 90  | .000  | 35940.000 | 37820.000 | 40412.000 |
| 91  | .000  | 37820.000 | 40412.000 | 39212.000 |
| 92  | .000  | 40412.000 | 39212.000 | 37375.000 |
| 93  | .000  | 39212.000 | 37375.000 | 35906.000 |
| 94  | .000  | 37375.000 | 35906.000 | 36808.000 |
| 95  | 1.000 | 35906.000 | 36808.000 | 35472.000 |
| 96  | .000  | 36808.000 | 35472.000 | 32066.000 |
| 97  | .000  | 35472.000 | 32066.000 | 34827.000 |
| 98  | .000  | 32066.000 | 34827.000 | 32407.000 |
| 99  | .000  | 34827.000 | 32407.000 | 35036.000 |
| 100 | .000  | 32407.000 | 35036.000 | 35258.000 |
| 101 | .000  | 35036.000 | 35258.000 | 37494.000 |
| 102 | .000  | 35258.000 | 37494.000 | 39344.000 |
| 103 | .000  | 37494.000 | 39344.000 | 38248.000 |

--

des dsmalls

| VARIABLE                 | NAME | IS | DSMALLS |
|--------------------------|------|----|---------|
| NUMBER OF OBSERVATIONS   |      |    | 103     |
| NUMBER OF MISSING VALUES |      |    | 0       |

|               | STATISTIC     | STD. ERROR | STATISTIC/S.E. |
|---------------|---------------|------------|----------------|
| MEAN          | 163357.7184   | 802.7747   | 203.4914       |
| VARIANCE      | 66378069.8709 |            |                |
| STD DEVIATION | 8147.2738     |            |                |
| C. V.         | .0499         |            |                |
| SKEWNESS      | -.1709        | .2379      |                |
| KURTOSIS      | -.2658        | .4716      |                |

QUARTILE



|              |             |
|--------------|-------------|
| MINIMUM      | 142759.0000 |
| 1ST QUARTILE | 158385.0000 |
| MEDIAN       | 162565.0000 |
| 3RD QUARTILE | 169610.0000 |
| MAXIMUM      | 181728.0000 |

RANGE

|           |            |
|-----------|------------|
| MAX - MIN | 38969.0000 |
| Q3 - Q1   | 11225.0000 |

--

des dsfalls

|                          |      |    |         |
|--------------------------|------|----|---------|
| VARIABLE                 | NAME | IS | DSFALLS |
| NUMBER OF OBSERVATIONS   |      |    | 103     |
| NUMBER OF MISSING VALUES |      |    | 0       |

|               | STATISTIC     | STD. ERROR | STATISTIC/S.E. |
|---------------|---------------|------------|----------------|
| MEAN          | 155678.4660   | 771.4831   | 201.7911       |
| VARIANCE      | 61304182.1140 |            |                |
| STD DEVIATION | 7829.6987     |            |                |
| C. V.         | .0503         |            |                |
| SKEWNESS      | -.1216        | .2379      |                |
| KURTOSIS      | -.3106        | .4716      |                |

QUARTILE

|              |             |
|--------------|-------------|
| MINIMUM      | 136118.0000 |
| 1ST QUARTILE | 150551.0000 |
| MEDIAN       | 154723.0000 |
| 3RD QUARTILE | 161889.0000 |
| MAXIMUM      | 173357.0000 |

RANGE

|           |            |
|-----------|------------|
| MAX - MIN | 37239.0000 |
| Q3 - Q1   | 11338.0000 |

--

des dsmhisps

|                          |      |    |          |
|--------------------------|------|----|----------|
| VARIABLE                 | NAME | IS | DSMHISPS |
| NUMBER OF OBSERVATIONS   |      |    | 103      |
| NUMBER OF MISSING VALUES |      |    | 0        |

|               | STATISTIC    | STD. ERROR | STATISTIC/S.E. |
|---------------|--------------|------------|----------------|
| MEAN          | 38328.2621   | 239.2368   | 160.2105       |
| VARIANCE      | 5895129.0385 |            |                |
| STD DEVIATION | 2427.9887    |            |                |
| C. V.         | .0633        |            |                |

|          |        |       |
|----------|--------|-------|
| SKEWNESS | .1693  | .2379 |
| KURTOSIS | -.2243 | .4716 |

QUARTILE

|              |            |
|--------------|------------|
| MINIMUM      | 32870.0000 |
| 1ST QUARTILE | 36820.0000 |
| MEDIAN       | 37849.0000 |
| 3RD QUARTILE | 40064.0000 |
| MAXIMUM      | 44597.0000 |

RANGE

|           |            |
|-----------|------------|
| MAX - MIN | 11727.0000 |
| Q3 - Q1   | 3244.0000  |

--

des dsfhisps

|                          |      |    |          |
|--------------------------|------|----|----------|
| VARIABLE                 | NAME | IS | DSFHISPS |
| NUMBER OF OBSERVATIONS   |      |    | 103      |
| NUMBER OF MISSING VALUES |      |    | 0        |

|               | STATISTIC    | STD. ERROR | STATISTIC/S.E. |
|---------------|--------------|------------|----------------|
| MEAN          | 36769.8252   | 234.5537   | 156.7651       |
| VARIANCE      | 5666588.3417 |            |                |
| STD DEVIATION | 2380.4597    |            |                |
| C. V.         | .0647        |            |                |
| SKEWNESS      | .1426        | .2379      |                |
| KURTOSIS      | -.4045       | .4716      |                |

QUARTILE

|              |            |
|--------------|------------|
| MINIMUM      | 31915.0000 |
| 1ST QUARTILE | 35258.0000 |
| MEDIAN       | 36690.0000 |
| 3RD QUARTILE | 38392.7500 |
| MAXIMUM      | 42821.0000 |

RANGE

|           |            |
|-----------|------------|
| MAX - MIN | 10906.0000 |
| Q3 - Q1   | 3134.7500  |

--

des nsmalls

|                          |      |    |         |
|--------------------------|------|----|---------|
| VARIABLE                 | NAME | IS | NSMALLS |
| NUMBER OF OBSERVATIONS   |      |    | 103     |
| NUMBER OF MISSING VALUES |      |    | 0       |

|  | STATISTIC | STD. ERROR | STATISTIC/S.E. |
|--|-----------|------------|----------------|
|--|-----------|------------|----------------|

|               |              |          |          |
|---------------|--------------|----------|----------|
| MEAN          | 16988.0291   | 103.9020 | 163.5005 |
| VARIANCE      | 1111949.1070 |          |          |
| STD DEVIATION | 1054.4900    |          |          |
| C. V.         | .0621        |          |          |
| SKEWNESS      | .2370        | .2379    |          |
| KURTOSIS      | -.1511       | .4716    |          |

QUARTILE

|              |            |
|--------------|------------|
| MINIMUM      | 14740.0000 |
| 1ST QUARTILE | 16315.2500 |
| MEDIAN       | 16953.0000 |
| 3RD QUARTILE | 17737.7500 |
| MAXIMUM      | 20089.0000 |

RANGE

|           |           |
|-----------|-----------|
| MAX - MIN | 5349.0000 |
| Q3 - Q1   | 1422.5000 |

--

des nsfalls

|                          |      |    |         |
|--------------------------|------|----|---------|
| VARIABLE                 | NAME | IS | NSFALLS |
| NUMBER OF OBSERVATIONS   |      |    | 103     |
| NUMBER OF MISSING VALUES |      |    | 0       |

|               | STATISTIC   | STD. ERROR | STATISTIC/S.E. |
|---------------|-------------|------------|----------------|
| MEAN          | 14628.7282  | 92.1885    | 158.6828       |
| VARIANCE      | 875368.2195 |            |                |
| STD DEVIATION | 935.6111    |            |                |
| C. V.         | .0640       |            |                |
| SKEWNESS      | .3043       | .2379      |                |
| KURTOSIS      | .0338       | .4716      |                |

QUARTILE

|              |            |
|--------------|------------|
| MINIMUM      | 12667.0000 |
| 1ST QUARTILE | 13930.0000 |
| MEDIAN       | 14627.0000 |
| 3RD QUARTILE | 15117.7500 |
| MAXIMUM      | 17405.0000 |

RANGE

|           |           |
|-----------|-----------|
| MAX - MIN | 4738.0000 |
| Q3 - Q1   | 1187.7500 |

--

des nsmhisps

```

VARIABLE   NAME   IS   NSMHISPS
NUMBER OF OBSERVATIONS   103
NUMBER OF MISSING VALUES   0

```

|               | STATISTIC   | STD. ERROR | STATISTIC/S.E. |
|---------------|-------------|------------|----------------|
| MEAN          | 4226.4660   | 33.7070    | 125.3884       |
| VARIANCE      | 117024.5454 |            |                |
| STD DEVIATION | 342.0885    |            |                |
| C. V.         | .0809       |            |                |
| SKEWNESS      | .3906       | .2379      |                |
| KURTOSIS      | .0652       | .4716      |                |

QUARTILE

|              |           |
|--------------|-----------|
| MINIMUM      | 3552.0000 |
| 1ST QUARTILE | 3985.7500 |
| MEDIAN       | 4220.0000 |
| 3RD QUARTILE | 4394.2500 |
| MAXIMUM      | 5253.0000 |

RANGE

|           |           |
|-----------|-----------|
| MAX - MIN | 1701.0000 |
| Q3 - Q1   | 408.5000  |

--

des nsfhisps

```

VARIABLE   NAME   IS   NSFHISPS
NUMBER OF OBSERVATIONS   103
NUMBER OF MISSING VALUES   0

```

|               | STATISTIC  | STD. ERROR | STATISTIC/S.E. |
|---------------|------------|------------|----------------|
| MEAN          | 3548.4078  | 28.4964    | 124.5214       |
| VARIANCE      | 83640.3811 |            |                |
| STD DEVIATION | 289.2065   |            |                |
| C. V.         | .0815      |            |                |
| SKEWNESS      | .5568      | .2379      |                |
| KURTOSIS      | .4099      | .4716      |                |

QUARTILE

|              |           |
|--------------|-----------|
| MINIMUM      | 3009.0000 |
| 1ST QUARTILE | 3359.5000 |
| MEDIAN       | 3524.0000 |
| 3RD QUARTILE | 3685.7500 |
| MAXIMUM      | 4467.0000 |

RANGE

|           |           |
|-----------|-----------|
| MAX - MIN | 1458.0000 |
| Q3 - Q1   | 326.2500  |

--

nonhm=dsmalls-dsmhisps  
--

nonhf=dsfalls-dsfhisps  
--

nonhpm=nsmalls-nsmhisps  
--

nonhpf=nsfalls-nsfhisps  
--

des nonhm

| VARIABLE                 | NAME | IS | NONHM |
|--------------------------|------|----|-------|
| NUMBER OF OBSERVATIONS   |      |    | 103   |
| NUMBER OF MISSING VALUES |      |    | 0     |

|               | STATISTIC     | STD. ERROR | STATISTIC/S.E. |
|---------------|---------------|------------|----------------|
| MEAN          | 125029.4563   | 586.1328   | 213.3125       |
| VARIANCE      | 35385819.6231 |            |                |
| STD DEVIATION | 5948.5981     |            |                |
| C. V.         | .0476         |            |                |
| SKEWNESS      | -.2687        | .2379      |                |
| KURTOSIS      | -.2445        | .4716      |                |

|              | QUARTILE    |
|--------------|-------------|
| MINIMUM      | 109508.0000 |
| 1ST QUARTILE | 121593.0000 |
| MEDIAN       | 125234.0000 |
| 3RD QUARTILE | 129559.5000 |
| MAXIMUM      | 137131.0000 |

|           | RANGE      |
|-----------|------------|
| MAX - MIN | 27623.0000 |
| Q3 - Q1   | 7966.5000  |

--

des nonhf

| VARIABLE                 | NAME | IS | NONHF |
|--------------------------|------|----|-------|
| NUMBER OF OBSERVATIONS   |      |    | 103   |
| NUMBER OF MISSING VALUES |      |    | 0     |

|          | STATISTIC     | STD. ERROR | STATISTIC/S.E. |
|----------|---------------|------------|----------------|
| MEAN     | 118908.6408   | 559.2828   | 212.6091       |
| VARIANCE | 32218118.2913 |            |                |

|               |           |       |
|---------------|-----------|-------|
| STD DEVIATION | 5676.1006 |       |
| C. V.         | .0477     |       |
| SKEWNESS      | -.2146    | .2379 |
| KURTOSIS      | -.2428    | .4716 |

QUARTILE

|              |             |
|--------------|-------------|
| MINIMUM      | 104052.0000 |
| 1ST QUARTILE | 115313.0000 |
| MEDIAN       | 118810.0000 |
| 3RD QUARTILE | 122895.8000 |
| MAXIMUM      | 130536.0000 |

RANGE

|           |            |
|-----------|------------|
| MAX - MIN | 26484.0000 |
| Q3 - Q1   | 7582.7500  |

--

des nonhpm

|                          |      |    |        |
|--------------------------|------|----|--------|
| VARIABLE                 | NAME | IS | NONHPM |
| NUMBER OF OBSERVATIONS   |      |    | 103    |
| NUMBER OF MISSING VALUES |      |    | 0      |

|               | STATISTIC   | STD. ERROR | STATISTIC/S.E. |
|---------------|-------------|------------|----------------|
| MEAN          | 12761.5631  | 71.4830    | 178.5259       |
| VARIANCE      | 526311.1504 |            |                |
| STD DEVIATION | 725.4731    |            |                |
| C. V.         | .0568       |            |                |
| SKEWNESS      | .1536       | .2379      |                |
| KURTOSIS      | -.2558      | .4716      |                |

QUARTILE

|              |            |
|--------------|------------|
| MINIMUM      | 11182.0000 |
| 1ST QUARTILE | 12276.5000 |
| MEDIAN       | 12733.0000 |
| 3RD QUARTILE | 13242.5000 |
| MAXIMUM      | 14836.0000 |

RANGE

|           |           |
|-----------|-----------|
| MAX - MIN | 3654.0000 |
| Q3 - Q1   | 966.0000  |

--

des nonhpf

|                          |      |    |        |
|--------------------------|------|----|--------|
| VARIABLE                 | NAME | IS | NONHPF |
| NUMBER OF OBSERVATIONS   |      |    | 103    |
| NUMBER OF MISSING VALUES |      |    | 0      |

|               | STATISTIC   | STD. ERROR | STATISTIC/S.E. |
|---------------|-------------|------------|----------------|
| MEAN          | 11080.3204  | 64.8137    | 170.9565       |
| VARIANCE      | 432683.6512 |            |                |
| STD DEVIATION | 657.7869    |            |                |
| C. V.         | .0594       |            |                |
| SKEWNESS      | .1719       | .2379      |                |
| KURTOSIS      | -.1035      | .4716      |                |

QUARTILE

|              |            |
|--------------|------------|
| MINIMUM      | 9613.0000  |
| 1ST QUARTILE | 10621.0000 |
| MEDIAN       | 11099.0000 |
| 3RD QUARTILE | 11463.0000 |
| MAXIMUM      | 12938.0000 |

RANGE

|           |           |
|-----------|-----------|
| MAX - MIN | 3325.0000 |
| Q3 - Q1   | 842.0000  |

--

uts nam moda. Mod psmhis(12)=con+(0)psmnh(12)+@  
(0)tsmhis(12)+(0)tsmhis1(12)+(0)tsmhis2(12)+noise

--

ues mod moda. Hol resi(modar). span 1,94

THE FOLLOWING ANALYSIS IS BASED ON TIME SPAN 1 THRU 94

NONLINEAR ESTIMATION TERMINATED DUE TO:  
RELATIVE CHANGE IN (OBJECTIVE FUNCTION)\*\*0.5 LESS THAN .1000D-02

SUMMARY FOR UNIVARIATE TIME SERIES MODEL -- MODA

| VARIABLE | TYPE OF VARIABLE | ORIGINAL OR CENTERED | DIFFERENCING         |
|----------|------------------|----------------------|----------------------|
| PSMHIS   | RANDOM           | ORIGINAL             | (1-B ) <sup>12</sup> |
| PSMNH    | RANDOM           | ORIGINAL             | (1-B ) <sup>12</sup> |
| TSMHIS   | RANDOM           | ORIGINAL             | (1-B ) <sup>12</sup> |
| TSMHIS1  | RANDOM           | ORIGINAL             | (1-B ) <sup>12</sup> |
| TSMHIS2  | RANDOM           | ORIGINAL             | (1-B ) <sup>12</sup> |

| PARAMETER LABEL | VARIABLE NAME | NUM./ DENOM. | FACTOR | ORDER | CONS- TRAINT | VALUE | STD ERROR | T VALUE |
|-----------------|---------------|--------------|--------|-------|--------------|-------|-----------|---------|
|-----------------|---------------|--------------|--------|-------|--------------|-------|-----------|---------|

|   |     |         |      |   |      |          |         |       |      |
|---|-----|---------|------|---|------|----------|---------|-------|------|
| 1 | CON | CNST    | 1    | 0 | NONE | -27.7007 | 14.3789 | -1.93 |      |
| 2 |     | PSMNH   | NUM. | 1 | 0    | NONE     | .1301   | .0549 | 2.37 |
| 3 |     | TSMHIS  | NUM. | 1 | 0    | NONE     | .0672   | .0209 | 3.21 |
| 4 |     | TSMHIS1 | NUM. | 1 | 0    | NONE     | .0062   | .0173 | .36  |
| 5 |     | TSMHIS2 | NUM. | 1 | 0    | NONE     | .0237   | .0161 | 1.47 |

EFFECTIVE NUMBER OF OBSERVATIONS . . . . . 82  
R-SQUARE . . . . . .899  
RESIDUAL STANDARD ERROR. . . . . .110106E+03  
--

uid modar

NAME OF THE SERIES . . . . . MODAR  
TIME PERIOD ANALYZED . . . . . 13 TO 94  
MEAN OF THE (DIFFERENCED) SERIES . . . . .0007  
STANDARD DEVIATION OF THE SERIES . . . . .110.1056  
T-VALUE OF MEAN (AGAINST ZERO) . . . . .0001

AUTOCORRELATIONS

|        |      |      |     |      |      |      |     |      |     |      |      |      |
|--------|------|------|-----|------|------|------|-----|------|-----|------|------|------|
| 1- 12  | .31  | .36  | .04 | .01  | .04  | .12  | .20 | .12  | .03 | -.23 | -.23 | -.36 |
| ST.E.  | .11  | .12  | .13 | .13  | .13  | .13  | .13 | .14  | .14 | .14  | .14  | .15  |
| 13- 24 | -.06 | -.07 | .01 | -.03 | -.05 | -.10 | .01 | -.01 | .13 | .01  | .11  | -.12 |
| ST.E.  | .16  | .16  | .16 | .16  | .16  | .16  | .16 | .16  | .16 | .16  | .16  | .16  |

PARTIAL AUTOCORRELATIONS

|        |     |     |      |      |     |     |     |      |      |      |      |      |
|--------|-----|-----|------|------|-----|-----|-----|------|------|------|------|------|
| 1- 12  | .31 | .29 | -.16 | -.08 | .12 | .14 | .12 | -.05 | -.11 | -.28 | -.10 | -.17 |
| ST.E.  | .11 | .11 | .11  | .11  | .11 | .11 | .11 | .11  | .11  | .11  | .11  | .11  |
| 13- 24 | .15 | .04 | -.07 | -.00 | .11 | .05 | .17 | -.05 | -.00 | -.24 | .05  | -.24 |
| ST.E.  | .11 | .11 | .11  | .11  | .11 | .11 | .11 | .11  | .11  | .11  | .11  | .11  |

uts nam mod1. Mod psmhis(12)=con+(0)psmnh(12)+@  
(0)tsmhis(12)+(0)tsmhis1(12)+(0)tsmhis2(12)+(12)/(1)noise

ues mod mod1. Hol resi(modlr). span 1,94

THE FOLLOWING ANALYSIS IS BASED ON TIME SPAN 1 THRU 94

NONLINEAR ESTIMATION TERMINATED DUE TO:  
RELATIVE CHANGE IN (OBJECTIVE FUNCTION)\*\*0.5 LESS THAN .1000D-02

SUMMARY FOR UNIVARIATE TIME SERIES MODEL -- MOD1

-----  
VARIABLE    TYPE OF    ORIGINAL    DIFFERENCING  
                 VARIABLE    OR CENTERED





SERIES PSMHIS IS FILTERED USING MODEL MOD1 , THE RESULT IS IN MOD1F  
--

PSMHEXP=psmhis-mod1f  
--

input mexp,mobs,mmod1f.

MEXP , A 9 BY 1 VARIABLE, IS STORED IN THE WORKSPACE  
MOBS , A 9 BY 1 VARIABLE, IS STORED IN THE WORKSPACE  
MMOD1F , A 9 BY 1 VARIABLE, IS STORED IN THE WORKSPACE  
--

Des mexp

| VARIABLE                 | NAME       | IS         | MEXP           |
|--------------------------|------------|------------|----------------|
| NUMBER OF OBSERVATIONS   |            |            | 9              |
| NUMBER OF MISSING VALUES |            |            | 0              |
|                          | STATISTIC  | STD. ERROR | STATISTIC/S.E. |
| MEAN                     | 3944.0755  | 89.2193    | 44.2065        |
| VARIANCE                 | 71640.8103 |            |                |
| STD DEVIATION            | 267.6580   |            |                |
| C. V.                    | .0679      |            |                |
| SKEWNESS                 | -.6802     | .7171      |                |
| KURTOSIS                 | -.9502     | 1.3997     |                |
|                          | QUARTILE   |            |                |
| MINIMUM                  | 3425.7670  |            |                |
| 1ST QUARTILE             | 3691.2710  |            |                |
| MEDIAN                   | 3997.0270  |            |                |
| 3RD QUARTILE             | 4090.0140  |            |                |
| MAXIMUM                  | 4251.3840  |            |                |
|                          | RANGE      |            |                |
| MAX - MIN                | 825.6167   |            |                |
| Q3 - Q1                  | 398.7434   |            |                |

--

Des mobs

| VARIABLE                 | NAME       | IS         | MOBS           |
|--------------------------|------------|------------|----------------|
| NUMBER OF OBSERVATIONS   |            |            | 9              |
| NUMBER OF MISSING VALUES |            |            | 0              |
|                          | STATISTIC  | STD. ERROR | STATISTIC/S.E. |
| MEAN                     | 4092.0000  | 84.2036    | 48.5965        |
| VARIANCE                 | 63812.2500 |            |                |
| STD DEVIATION            | 252.6109   |            |                |

|          |         |        |
|----------|---------|--------|
| C. V.    | .0617   |        |
| SKEWNESS | -.0396  | .7171  |
| KURTOSIS | -1.3091 | 1.3997 |

QUARTILE

|              |           |
|--------------|-----------|
| MINIMUM      | 3698.0000 |
| 1ST QUARTILE | 3838.2500 |
| MEDIAN       | 4105.0000 |
| 3RD QUARTILE | 4224.2500 |
| MAXIMUM      | 4501.0000 |

RANGE

|           |          |
|-----------|----------|
| MAX - MIN | 803.0000 |
| Q3 - Q1   | 386.0000 |

--

Des mmod1f

|                          |      |    |        |
|--------------------------|------|----|--------|
| VARIABLE                 | NAME | IS | MMOD1F |
| NUMBER OF OBSERVATIONS   |      |    | 9      |
| NUMBER OF MISSING VALUES |      |    | 0      |

|               | STATISTIC | STD. ERROR | STATISTIC/S.E. |
|---------------|-----------|------------|----------------|
| MEAN          | 147.9246  | 31.6400    | 4.6752         |
| VARIANCE      | 9009.7784 |            |                |
| STD DEVIATION | 94.9199   |            |                |
| C. V.         | .6417     |            |                |
| SKEWNESS      | -.2180    | .7171      |                |
| KURTOSIS      | -1.4309   | 1.3997     |                |

QUARTILE

|              |          |
|--------------|----------|
| MINIMUM      | -13.0740 |
| 1ST QUARTILE | 67.2747  |
| MEDIAN       | 145.0880 |
| 3RD QUARTILE | 215.6662 |
| MAXIMUM      | 272.2330 |

RANGE

|           |          |
|-----------|----------|
| MAX - MIN | 285.3070 |
| Q3 - Q1   | 148.3915 |

--

uts nam mod1a. Mod mod1f=(0)n16step(bin)+noise

--

ues mod mod1a. Hol resi(mod1ar).



--

oes mod mod1a

THE FOLLOWING ANALYSIS IS BASED ON TIME SPAN 14 THRU 103

SUMMARY FOR UNIVARIATE TIME SERIES MODEL -- MOD1A

```

-----
VARIABLE      TYPE OF      ORIGINAL      DIFFERENCING
              VARIABLE    OR CENTERED
MOD1F         RANDOM      ORIGINAL      NONE
N16STEP       BINARY      ORIGINAL      NONE
-----
PARAMETER     VARIABLE    NUM./   FACTOR   ORDER   CONS-   VALUE      STD      T
  LABEL       NAME       DENOM.                                TRRAINT
1             N16STEP    NUM.     1        0       NONE    147.8632   28.1576  5.25

```

SUMMARY OF OUTLIER DETECTION AND ADJUSTMENT

```

-----
TIME      ESTIMATE    T-VALUE    TYPE
-----
41        258.067     3.06       AO
-----

```

```

TOTAL NUMBER OF OBSERVATIONS. . . . . 90
EFFECTIVE NUMBER OF OBSERVATIONS. . . . . 90
RESIDUAL STANDARD ERROR (WITHOUT OUTLIER ADJUSTMENT). . . . .882969E+02
RESIDUAL STANDARD ERROR (WITH OUTLIER ADJUSTMENT) . . . . .844727E+02
--

```

uts nam mod1b. Mod mod1f=(0 to 8)nov16(bin)+noise

--

ues mod mod1b. Hol resi(mod1br).

```

** THE TIME SERIES TO BE ANALYZED HAVE MISSING DATA AT THE
** BEGINNING OR THE USER HAS SPECIFIED TIME SPAN, SOME
** GENERATED SERIES SUCH AS RESIDUALS, FITTED VALUES,
** DISTURBANCE, AND FILTERED SERIES WILL BE SHORTER THAN THE
** ORIGINAL SERIES.

```

THE FOLLOWING ANALYSIS IS BASED ON TIME SPAN 14 THRU 103

```

NONLINEAR ESTIMATION TERMINATED DUE TO:
RELATIVE CHANGE IN (OBJECTIVE FUNCTION)**0.5 LESS THAN .1000D-02

```

SUMMARY FOR UNIVARIATE TIME SERIES MODEL -- MOD1B



ues mod modb. Hol resi(modbr). span 1,94

THE FOLLOWING ANALYSIS IS BASED ON TIME SPAN 1 THRU 94

NONLINEAR ESTIMATION TERMINATED DUE TO:  
RELATIVE CHANGE IN (OBJECTIVE FUNCTION)\*\*0.5 LESS THAN .1000D-02

SUMMARY FOR UNIVARIATE TIME SERIES MODEL -- MODB

```

-----
VARIABLE  TYPE OF  ORIGINAL  DIFFERENCING
          VARIABLE OR CENTERED
          12
PSFHIS    RANDOM  ORIGINAL  (1-B )
          12
PSFNH     RANDOM  ORIGINAL  (1-B )
          12
TSFHIS    RANDOM  ORIGINAL  (1-B )
          12
TSFHIS1   RANDOM  ORIGINAL  (1-B )
          12
TSFHIS2   RANDOM  ORIGINAL  (1-B )
-----

```

| PARAMETER LABEL | VARIABLE NAME | NUM./ DENOM. | FACTOR | ORDER | CONS- TRAINT | VALUE    | STD ERROR | T VALUE |
|-----------------|---------------|--------------|--------|-------|--------------|----------|-----------|---------|
| 1               | CON           | CNST         | 1      | 0     | NONE         | -24.2229 | 11.4199   | -2.12   |
| 2               | PSFNH         | NUM.         | 1      | 0     | NONE         | .1087    | .0479     | 2.27    |
| 3               | TSFHIS        | NUM.         | 1      | 0     | NONE         | .0768    | .0177     | 4.34    |
| 4               | TSFHIS1       | NUM.         | 1      | 0     | NONE         | .0151    | .0139     | 1.08    |
| 5               | TSFHIS2       | NUM.         | 1      | 0     | NONE         | .0057    | .0135     | .42     |

EFFECTIVE NUMBER OF OBSERVATIONS . . . . . 82  
R-SQUARE . . . . . .908  
RESIDUAL STANDARD ERROR. . . . . .888259E+02  
--

uid modbr

NAME OF THE SERIES . . . . . MODBR  
TIME PERIOD ANALYZED . . . . . 13 TO 94  
MEAN OF THE (DIFFERENCED) SERIES . . . . . -.0002  
STANDARD DEVIATION OF THE SERIES . . . . . 88.8259  
T-VALUE OF MEAN (AGAINST ZERO) . . . . . .0000

AUTOCORRELATIONS

|        |     |      |      |      |     |      |      |     |     |      |      |      |
|--------|-----|------|------|------|-----|------|------|-----|-----|------|------|------|
| 1- 12  | .08 | -.01 | .13  | .11  | .01 | .04  | .07  | .01 | .01 | .26  | .06  | -.33 |
| ST.E.  | .11 | .11  | .11  | .11  | .11 | .11  | .11  | .12 | .12 | .12  | .12  | .12  |
| 13- 24 | .02 | .04  | -.12 | -.07 | .13 | -.17 | -.06 | .01 | .03 | -.14 | -.03 | -.03 |
| ST.E.  | .13 | .13  | .13  | .13  | .13 | .14  | .14  | .14 | .14 | .14  | .14  | .14  |

PARTIAL AUTOCORRELATIONS

|        |     |      |      |      |     |      |     |      |     |     |     |      |
|--------|-----|------|------|------|-----|------|-----|------|-----|-----|-----|------|
| 1- 12  | .08 | -.02 | .13  | .09  | .00 | .03  | .05 | -.01 | .00 | .24 | .01 | -.35 |
| ST.E.  | .11 | .11  | .11  | .11  | .11 | .11  | .11 | .11  | .11 | .11 | .11 | .11  |
| 13- 24 | .01 | -.00 | -.07 | -.02 | .15 | -.22 | .01 | -.03 | .04 | .05 | .04 | -.22 |
| ST.E.  | .11 | .11  | .11  | .11  | .11 | .11  | .11 | .11  | .11 | .11 | .11 | .11  |

uts nam mod2. Mod psfhis(12)=con+(0)psfnh(12)+@  
 (0)tsfhis(12)+(0)tsfhis1(12)+(0)tsfhis2(12)+(10)(12)noise

ues mod mod2. Hol resi(mod2r). span 1,94

THE FOLLOWING ANALYSIS IS BASED ON TIME SPAN 1 THRU 94

NONLINEAR ESTIMATION TERMINATED DUE TO:  
 RELATIVE CHANGE IN (OBJECTIVE FUNCTION)\*\*0.5 LESS THAN .1000D-02

SUMMARY FOR UNIVARIATE TIME SERIES MODEL -- MOD2

| VARIABLE | TYPE OF VARIABLE | ORIGINAL OR CENTERED | DIFFERENCING |
|----------|------------------|----------------------|--------------|
| PSFHIS   | RANDOM           | ORIGINAL             | 12<br>(1-B ) |
| PSFNH    | RANDOM           | ORIGINAL             | 12<br>(1-B ) |
| TSFHIS   | RANDOM           | ORIGINAL             | 12<br>(1-B ) |
| TSFHIS1  | RANDOM           | ORIGINAL             | 12<br>(1-B ) |
| TSFHIS2  | RANDOM           | ORIGINAL             | 12<br>(1-B ) |

| PARAMETER LABEL | VARIABLE NAME | NUM./ DENOM. | FACTOR | ORDER | CONS- TRAINT | VALUE    | STD ERROR | T VALUE |
|-----------------|---------------|--------------|--------|-------|--------------|----------|-----------|---------|
| 1               | CON           | CNST         | 1      | 0     | NONE         | -22.8078 | 7.1604    | -3.19   |
| 2               | PSFNH         | NUM.         | 1      | 0     | NONE         | .1463    | .0468     | 3.13    |
| 3               | TSFHIS        | NUM.         | 1      | 0     | NONE         | .0676    | .0149     | 4.55    |
| 4               | TSFHIS1       | NUM.         | 1      | 0     | NONE         | .0195    | .0089     | 2.21    |
| 5               | TSFHIS2       | NUM.         | 1      | 0     | NONE         | .0067    | .0092     | .72     |
| 6               | PSFHIS        | MA           | 1      | 10    | NONE         | -.3915   | .1116     | -3.51   |
| 7               | PSFHIS        | MA           | 2      | 12    | NONE         | .6560    | .0956     | 6.86    |

EFFECTIVE NUMBER OF OBSERVATIONS . . . . . 82  
 R-SQUARE . . . . . .936  
 RESIDUAL STANDARD ERROR. . . . . .742454E+02



uid mod2r

|                                            |         |
|--------------------------------------------|---------|
| NAME OF THE SERIES . . . . .               | MOD2R   |
| TIME PERIOD ANALYZED . . . . . 13 TO       | 94      |
| MEAN OF THE (DIFFERENCED) SERIES . . . . . | .1956   |
| STANDARD DEVIATION OF THE SERIES . . . . . | 74.2451 |
| T-VALUE OF MEAN (AGAINST ZERO) . . . . .   | .0239   |

AUTOCORRELATIONS

|        |     |     |      |      |      |      |      |      |     |      |      |      |
|--------|-----|-----|------|------|------|------|------|------|-----|------|------|------|
| 1- 12  | .15 | .09 | .10  | .04  | .04  | -.07 | .01  | .01  | .03 | -.03 | .00  | .05  |
| ST.E.  | .11 | .11 | .11  | .11  | .11  | .11  | .12  | .12  | .12 | .12  | .12  | .12  |
| 13- 24 | .07 | .02 | -.08 | -.10 | -.01 | -.16 | -.07 | -.06 | .05 | .01  | -.01 | -.09 |
| ST.E.  | .12 | .12 | .12  | .12  | .12  | .12  | .12  | .12  | .12 | .12  | .12  | .12  |

PARTIAL AUTOCORRELATIONS

|        |     |      |      |      |     |      |     |      |     |      |     |      |
|--------|-----|------|------|------|-----|------|-----|------|-----|------|-----|------|
| 1- 12  | .15 | .06  | .08  | .01  | .03 | -.09 | .02 | .01  | .04 | -.04 | .01 | .04  |
| ST.E.  | .11 | .11  | .11  | .11  | .11 | .11  | .11 | .11  | .11 | .11  | .11 | .11  |
| 13- 24 | .07 | -.01 | -.09 | -.10 | .03 | -.14 | .01 | -.04 | .09 | -.01 | .02 | -.14 |
| ST.E.  | .11 | .11  | .11  | .11  | .11 | .11  | .11 | .11  | .11 | .11  | .11 | .11  |

--

filt old psfhis. New mod2f. mod mod2.

THE FOLLOWING ANALYSIS IS BASED ON TIME SPAN 1 THRU 103  
 SERIES PSFHIS IS FILTERED USING MODEL MOD2 , THE RESULT IS IN MOD2F  
 --

uts nam mod2b. Mod mod2f=(0)n16step(bin)+noise

--

ues mod mod2b. Hol resi(mod2br).

\*\* THE TIME SERIES TO BE ANALYZED HAVE MISSING DATA AT THE  
 \*\* BEGINNING OR THE USER HAS SPECIFIED TIME SPAN, SOME  
 \*\* GENERATED SERIES SUCH AS RESIDUALS, FITTED VALUES,  
 \*\* DISTURBANCE, AND FILTERED SERIES WILL BE SHORTER THAN THE  
 \*\* ORIGINAL SERIES.

THE FOLLOWING ANALYSIS IS BASED ON TIME SPAN 13 THRU 103

NONLINEAR ESTIMATION TERMINATED DUE TO:  
 RELATIVE CHANGE IN (OBJECTIVE FUNCTION)\*\*0.5 LESS THAN .1000D-02

SUMMARY FOR UNIVARIATE TIME SERIES MODEL -- MOD2B

-----  
 VARIABLE    TYPE OF    ORIGINAL    DIFFERENCING  
                  VARIABLE    OR CENTERED



| PARAMETER LABEL | VARIABLE NAME | NUM./DENOM. | FACTOR | ORDER | CONS-TRAI NT | VALUE    | STD ERROR | T VALUE |
|-----------------|---------------|-------------|--------|-------|--------------|----------|-----------|---------|
| 1               | N16STEP       | NUM.        | 1      | 0     | NONE         | 110.7774 | 22.9210   | 4.83    |

SUMMARY OF OUTLIER DETECTION AND ADJUSTMENT

| TIME | ESTIMATE | T-VALUE | TYPE |
|------|----------|---------|------|
| 63   | -208.229 | -3.03   | AO   |

TOTAL NUMBER OF OBSERVATIONS. . . . . 91  
EFFECTIVE NUMBER OF OBSERVATIONS. . . . . 91  
RESIDUAL STANDARD ERROR (WITHOUT OUTLIER ADJUSTMENT). . . . .717834E+02  
RESIDUAL STANDARD ERROR (WITH OUTLIER ADJUSTMENT) . . . . .687629E+02  
--

uts nam mod2c. Mod mod2f=(0 to 8)nov16(bin)+noise

--

ues mod mod2c. Hol resi(mod2cr).

\*\* THE TIME SERIES TO BE ANALYZED HAVE MISSING DATA AT THE  
\*\* BEGINNING OR THE USER HAS SPECIFIED TIME SPAN, SOME  
\*\* GENERATED SERIES SUCH AS RESIDUALS, FITTED VALUES,  
\*\* DISTURBANCE, AND FILTERED SERIES WILL BE SHORTER THAN THE  
\*\* ORIGINAL SERIES.

THE FOLLOWING ANALYSIS IS BASED ON TIME SPAN 13 THRU 103

NONLINEAR ESTIMATION TERMINATED DUE TO:  
RELATIVE CHANGE IN (OBJECTIVE FUNCTION)\*\*0.5 LESS THAN .1000D-02

SUMMARY FOR UNIVARIATE TIME SERIES MODEL -- MOD2C

| VARIABLE | TYPE OF VARIABLE | ORIGINAL OR CENTERED | DIFFERENCING |
|----------|------------------|----------------------|--------------|
| MOD2F    | RANDOM           | ORIGINAL             | NONE         |
| NOV16    | BINARY           | ORIGINAL             | NONE         |

| PARAMETER LABEL | VARIABLE NAME | NUM./DENOM. | FACTOR | ORDER | CONS-TRAI NT | VALUE    | STD ERROR | T VALUE |
|-----------------|---------------|-------------|--------|-------|--------------|----------|-----------|---------|
| 1               | NOV16         | NUM.        | 1      | 0     | NONE         | 149.5927 | 69.5361   | 2.15    |
| 2               | NOV16         | NUM.        | 1      | 1     | NONE         | 115.4649 | 69.5361   | 1.66    |
| 3               | NOV16         | NUM.        | 1      | 2     | NONE         | 103.7139 | 69.5361   | 1.49    |
| 4               | NOV16         | NUM.        | 1      | 3     | NONE         | 178.4997 | 69.5361   | 2.57    |
| 5               | NOV16         | NUM.        | 1      | 4     | NONE         | 100.7980 | 69.5361   | 1.45    |



QUARTILE

MINIMUM 3110.0000  
 1ST QUARTILE 3177.7500  
 MEDIAN 3497.0000  
 3RD QUARTILE 3536.7500  
 MAXIMUM 3691.0000

RANGE

MAX - MIN 581.0000  
 Q3 - Q1 359.0000

--

PSfHEXP=psfhis-mod2f

--

Prin years,months,psfhis,psfhexp,psmhis,psmhexp

YEARS IS A 103 BY 1 VARIABLE  
 MONTHS IS A 103 BY 1 VARIABLE  
 PSFHis IS A 103 BY 1 VARIABLE  
 PSFHEXP IS A 103 BY 1 VARIABLE  
 PSMHis IS A 103 BY 1 VARIABLE  
 PSMHEXP IS A 103 BY 1 VARIABLE

| VARIABLE  | YEARS    | MONTHS | PSFHis   | PSFHEXP  | PSMHis   | PSMHEXP  |
|-----------|----------|--------|----------|----------|----------|----------|
| COLUMN--> | 1        | 1      | 1        | 1        | 1        | 1        |
| ROW       |          |        |          |          |          |          |
| 1         | 2009.000 | 1.000  | 4186.000 | ***      | 4969.000 | ***      |
| 2         | 2009.000 | 2.000  | 3678.000 | ***      | 4274.000 | ***      |
| 3         | 2009.000 | 3.000  | 4179.000 | ***      | 4806.000 | ***      |
| 4         | 2009.000 | 4.000  | 4068.000 | ***      | 4722.000 | ***      |
| 5         | 2009.000 | 5.000  | 4228.000 | ***      | 4937.000 | ***      |
| 6         | 2009.000 | 6.000  | 4287.000 | ***      | 5062.000 | ***      |
| 7         | 2009.000 | 7.000  | 4467.000 | ***      | 5253.000 | ***      |
| 8         | 2009.000 | 8.000  | 3975.000 | ***      | 4948.000 | ***      |
| 9         | 2009.000 | 9.000  | 3720.000 | ***      | 4344.000 | ***      |
| 10        | 2009.000 | 10.000 | 4055.000 | ***      | 4821.000 | ***      |
| 11        | 2009.000 | 11.000 | 3542.000 | ***      | 4370.000 | ***      |
| 12        | 2009.000 | 12.000 | 3980.000 | ***      | 4677.000 | ***      |
| 13        | 2010.000 | 1.000  | 3863.000 | 3775.954 | 4625.000 | ***      |
| 14        | 2010.000 | 2.000  | 3360.000 | 3344.503 | 3995.000 | 3968.867 |
| 15        | 2010.000 | 3.000  | 3856.000 | 3945.289 | 4440.000 | 4501.207 |
| 16        | 2010.000 | 4.000  | 3625.000 | 3709.634 | 4274.000 | 4270.243 |
| 17        | 2010.000 | 5.000  | 3936.000 | 3861.382 | 4338.000 | 4498.478 |
| 18        | 2010.000 | 6.000  | 3841.000 | 3888.639 | 4692.000 | 4587.037 |
| 19        | 2010.000 | 7.000  | 3852.000 | 3981.820 | 4622.000 | 4777.671 |
| 20        | 2010.000 | 8.000  | 3805.000 | 3749.825 | 4614.000 | 4553.411 |
| 21        | 2010.000 | 9.000  | 3456.000 | 3478.450 | 4151.000 | 4113.557 |
| 22        | 2010.000 | 10.000 | 3956.000 | 3851.744 | 4681.000 | 4578.192 |
| 23        | 2010.000 | 11.000 | 3593.000 | 3540.557 | 4323.000 | 4333.215 |
| 24        | 2010.000 | 12.000 | 3878.000 | 3866.911 | 4508.000 | 4572.536 |
| 25        | 2011.000 | 1.000  | 3761.000 | 3614.911 | 4351.000 | 4445.580 |
| 26        | 2011.000 | 2.000  | 3254.000 | 3154.539 | 3811.000 | 3772.887 |
| 27        | 2011.000 | 3.000  | 3781.000 | 3664.367 | 4356.000 | 4254.964 |
| 28        | 2011.000 | 4.000  | 3296.000 | 3421.614 | 4068.000 | 4104.965 |
| 29        | 2011.000 | 5.000  | 3617.000 | 3692.407 | 4373.000 | 4317.970 |

|    |          |        |          |          |          |          |
|----|----------|--------|----------|----------|----------|----------|
| 30 | 2011.000 | 6.000  | 3760.000 | 3831.469 | 4633.000 | 4627.254 |
| 31 | 2011.000 | 7.000  | 3704.000 | 3779.675 | 4588.000 | 4588.333 |
| 32 | 2011.000 | 8.000  | 3706.000 | 3689.641 | 4348.000 | 4516.791 |
| 33 | 2011.000 | 9.000  | 3285.000 | 3260.171 | 3958.000 | 3860.737 |
| 34 | 2011.000 | 10.000 | 3729.000 | 3653.432 | 4345.000 | 4252.593 |
| 35 | 2011.000 | 11.000 | 3371.000 | 3370.717 | 4123.000 | 4114.581 |
| 36 | 2011.000 | 12.000 | 3600.000 | 3639.455 | 4209.000 | 4243.474 |
| 37 | 2012.000 | 1.000  | 3654.000 | 3593.593 | 4099.000 | 4226.446 |
| 38 | 2012.000 | 2.000  | 3141.000 | 3153.940 | 3798.000 | 3710.482 |
| 39 | 2012.000 | 3.000  | 3472.000 | 3478.684 | 4220.000 | 4119.113 |
| 40 | 2012.000 | 4.000  | 3250.000 | 3185.087 | 3787.000 | 3866.291 |
| 41 | 2012.000 | 5.000  | 3524.000 | 3588.437 | 4476.000 | 4217.933 |
| 42 | 2012.000 | 6.000  | 3516.000 | 3648.397 | 4385.000 | 4431.266 |
| 43 | 2012.000 | 7.000  | 3778.000 | 3776.460 | 4550.000 | 4519.015 |
| 44 | 2012.000 | 8.000  | 3684.000 | 3660.472 | 4404.000 | 4434.981 |
| 45 | 2012.000 | 9.000  | 3245.000 | 3194.393 | 3875.000 | 3789.449 |
| 46 | 2012.000 | 10.000 | 3674.000 | 3718.016 | 4475.000 | 4383.241 |
| 47 | 2012.000 | 11.000 | 3481.000 | 3371.531 | 4087.000 | 4036.809 |
| 48 | 2012.000 | 12.000 | 3586.000 | 3509.701 | 4314.000 | 4141.634 |
| 49 | 2013.000 | 1.000  | 3526.000 | 3540.924 | 4152.000 | 4210.311 |
| 50 | 2013.000 | 2.000  | 3024.000 | 2951.293 | 3558.000 | 3501.134 |
| 51 | 2013.000 | 3.000  | 3358.000 | 3351.253 | 3951.000 | 4040.606 |
| 52 | 2013.000 | 4.000  | 3170.000 | 3154.626 | 3634.000 | 3812.499 |
| 53 | 2013.000 | 5.000  | 3440.000 | 3546.953 | 4082.000 | 4188.097 |
| 54 | 2013.000 | 6.000  | 3491.000 | 3434.010 | 4107.000 | 4162.219 |
| 55 | 2013.000 | 7.000  | 3636.000 | 3695.303 | 4482.000 | 4444.095 |
| 56 | 2013.000 | 8.000  | 3569.000 | 3513.254 | 4240.000 | 4307.077 |
| 57 | 2013.000 | 9.000  | 3084.000 | 3161.216 | 3796.000 | 3662.323 |
| 58 | 2013.000 | 10.000 | 3497.000 | 3639.421 | 4225.000 | 4371.004 |
| 59 | 2013.000 | 11.000 | 3250.000 | 3255.233 | 3827.000 | 3982.699 |
| 60 | 2013.000 | 12.000 | 3501.000 | 3611.521 | 4107.000 | 4207.826 |
| 61 | 2014.000 | 1.000  | 3506.000 | 3553.932 | 4151.000 | 4174.656 |
| 62 | 2014.000 | 2.000  | 3009.000 | 3027.599 | 3564.000 | 3599.284 |
| 63 | 2014.000 | 3.000  | 3152.000 | 3360.229 | 3927.000 | 3984.967 |
| 64 | 2014.000 | 4.000  | 3212.000 | 3284.724 | 3771.000 | 3799.471 |
| 65 | 2014.000 | 5.000  | 3518.000 | 3487.543 | 4122.000 | 4193.638 |
| 66 | 2014.000 | 6.000  | 3498.000 | 3549.984 | 4124.000 | 4199.819 |
| 67 | 2014.000 | 7.000  | 3655.000 | 3686.178 | 4499.000 | 4450.437 |
| 68 | 2014.000 | 8.000  | 3398.000 | 3447.360 | 4103.000 | 4246.865 |
| 69 | 2014.000 | 9.000  | 3154.000 | 3217.358 | 3882.000 | 3771.780 |
| 70 | 2014.000 | 10.000 | 3556.000 | 3591.883 | 4333.000 | 4312.390 |
| 71 | 2014.000 | 11.000 | 3281.000 | 3265.765 | 3902.000 | 3930.290 |
| 72 | 2014.000 | 12.000 | 3497.000 | 3588.807 | 4289.000 | 4245.388 |
| 73 | 2015.000 | 1.000  | 3531.000 | 3405.962 | 4098.000 | 4154.488 |
| 74 | 2015.000 | 2.000  | 3065.000 | 2994.745 | 3552.000 | 3568.872 |
| 75 | 2015.000 | 3.000  | 3472.000 | 3397.076 | 4062.000 | 4006.456 |
| 76 | 2015.000 | 4.000  | 3160.000 | 3229.465 | 3870.000 | 3873.797 |
| 77 | 2015.000 | 5.000  | 3480.000 | 3445.474 | 4026.000 | 4101.369 |
| 78 | 2015.000 | 6.000  | 3483.000 | 3524.083 | 4214.000 | 4240.315 |
| 79 | 2015.000 | 7.000  | 3625.000 | 3697.502 | 4391.000 | 4477.546 |
| 80 | 2015.000 | 8.000  | 3457.000 | 3458.362 | 4250.000 | 4178.137 |
| 81 | 2015.000 | 9.000  | 3311.000 | 3180.346 | 3775.000 | 3890.065 |
| 82 | 2015.000 | 10.000 | 3588.000 | 3515.168 | 4252.000 | 4292.173 |
| 83 | 2015.000 | 11.000 | 3291.000 | 3358.152 | 3844.000 | 3868.320 |
| 84 | 2015.000 | 12.000 | 3581.000 | 3577.385 | 4309.000 | 4213.276 |
| 85 | 2016.000 | 1.000  | 3429.000 | 3485.734 | 4031.000 | 4083.055 |
| 86 | 2016.000 | 2.000  | 3224.000 | 3133.144 | 3735.000 | 3641.280 |
| 87 | 2016.000 | 3.000  | 3449.000 | 3393.347 | 4087.000 | 4035.618 |
| 88 | 2016.000 | 4.000  | 3183.000 | 3189.602 | 3818.000 | 3800.924 |
| 89 | 2016.000 | 5.000  | 3476.000 | 3425.537 | 4190.000 | 4067.452 |
| 90 | 2016.000 | 6.000  | 3593.000 | 3504.584 | 4250.000 | 4269.724 |
| 91 | 2016.000 | 7.000  | 3631.000 | 3588.139 | 4451.000 | 4332.513 |
| 92 | 2016.000 | 8.000  | 3645.000 | 3572.073 | 4381.000 | 4245.766 |

|     |          |        |          |          |          |          |
|-----|----------|--------|----------|----------|----------|----------|
| 93  | 2016.000 | 9.000  | 3118.000 | 3124.247 | 3844.000 | 3777.837 |
| 94  | 2016.000 | 10.000 | 3589.000 | 3474.647 | 4161.000 | 4144.675 |
| 95  | 2016.000 | 11.000 | 3363.000 | 3213.406 | 3914.000 | 3846.977 |
| 96  | 2016.000 | 12.000 | 3581.000 | 3465.534 | 4238.000 | 4093.040 |
| 97  | 2017.000 | 1.000  | 3500.000 | 3396.285 | 4065.000 | 3996.997 |
| 98  | 2017.000 | 2.000  | 3116.000 | 2937.499 | 3698.000 | 3425.850 |
| 99  | 2017.000 | 3.000  | 3461.000 | 3360.201 | 4105.000 | 3965.862 |
| 100 | 2017.000 | 4.000  | 3110.000 | 3040.508 | 3813.000 | 3639.503 |
| 101 | 2017.000 | 5.000  | 3497.000 | 3433.023 | 4311.000 | 4081.368 |
| 102 | 2017.000 | 6.000  | 3549.000 | 3499.223 | 4183.000 | 4196.008 |
| 103 | 2017.000 | 7.000  | 3691.000 | 3525.325 | 4501.000 | 4251.627 |

--

stop

**eTable 1.** Estimated Parameters for Step 1 Regressions and Step 2 Transfer Functions for Monthly Male and Female Preterm Births to Latina Women in the United States for the First 94 Months of the Obama Presidency

|                                                              | Step 1 regressions |                 | Step 2 transfer functions |                 |
|--------------------------------------------------------------|--------------------|-----------------|---------------------------|-----------------|
|                                                              | Males              | Females         | Males                     | Females         |
| Constant                                                     | -27.70 (14.38)     | -24.22* (11.42) | -34.21** (8.39)           | -22.81** (7.16) |
| Term births (differenced at) to Latina women at month t      | 0.07** (0.02)      | 0.08** (0.02)   | 0.07** (0.02)             | 0.07** (0.01)   |
| Term births (differenced at 12) to Latina women at month t+1 | 0.01 (0.02)        | 0.01 (0.01)     | 0.01 (0.01)               | 0.02* (0.01)    |
| Term Births (differenced at 12) to Latina women at month t+2 | 0.02 (0.0161)      | 0.01 (0.01)     | 0.02 (0.01)               | 0.01 (0.01)     |
| Preterm births (differenced at 12) to other women at month t | 0.13* (0.05)       | 0.11* (0.05)    | 0.14** (0.04)             | 0.15** (0.05)   |
| Autoregression at p=1                                        |                    |                 | 0.23* (0.11)              | none            |
| Moving Average at q = 10                                     |                    |                 | none                      | -0.39** (0.11)  |
| Moving Average at q = 12                                     |                    |                 | 0.77** (0.08)             | 0.67** (0.09)   |

\*p<.05, 2-tailed test

\*\*p<.01, 2-tailed test

Standard errors are given in parentheses. Births were differenced at 12 months.



**eTable 2.** Estimated Parameters for Regressions of Male and Female Preterm Births to Latina Women on the Presidential Election of November 2016

|                             | Male             | Female          |
|-----------------------------|------------------|-----------------|
| Constant                    | 0.55 (9.66)      | 1.82 (8.08)     |
| Election in month of births | 66.46 (83.14)    | 147.76* (69.98) |
| 1 month before births       | 144.40 (83.14)   | 113.64 (69.98)  |
| 2 months before births      | 67.44 (83.14)    | 101.88 (69.98)  |
| 3 months before births      | 271.58** (83.14) | 176.67* (69.98) |
| 4 months before births      | 138.57 (83.14)   | 98.97 (69.98)   |
| 5 months before births      | 172.93* (83.14)  | 67.66 (69.98)   |
| 6 months before births      | 229.07** (83.14) | 62.15 (69.98)   |
| 7 months before births      | -13.56 (83.14)   | 47.95 (69.98)   |
| 8 months before births      | 248.82** (83.14) | 163.84* (69.98) |

\* $p < .05$ , 2-tailed test

\*\* $p < .01$ , 2-tailed test

Regressions are adjusted for population at risk and preterm births to non-Latina women. Includes 103 months ending July 2017. Standard errors are given in parentheses.

**eTable 3.** Estimated Parameters for Full Transfer Functions for Monthly Male and Female Preterm Births to Latina women in the United States for the 103 Months Beginning January 2009

|                                                                             | Males            | Females          |
|-----------------------------------------------------------------------------|------------------|------------------|
| Constant                                                                    | -32.39** (8.25)  | -23.27** (6.82)  |
| Term births (differenced at 12 months) to Latina women at month t           | 0.06** (0.02)    | 0.14** (0.04)    |
| Term births (differenced at 12 months) to Latina women at month t+1         | 0.01 (0.01)      | 0.02* (0.01)     |
| Term Births (differenced at 12 months) to Latina women at month t+2         | 0.01 (0.01)      | 0.01 (0.01)      |
| Preterm births (differenced at 12 months) to other women at month t         | 0.15** (0.05)    | 0.14* (0.04)     |
| Election variable (scored 1 for November through July 2016 and 0 otherwise) | 177.80** (41.73) | 112.77** (27.82) |
| Autoregression at p=1                                                       | 0.20* (0.10)     | none             |
| Moving Average at q = 10                                                    | none             | -0.36** (0.11)   |
| Moving Average at q = 12                                                    | 0.72** (0.09)    | 0.66** (0.09)    |

\* $p < .05$ , 2-tailed test

\*\* $p < .01$ , 2-tailed test

Standard errors are given in parentheses. Functions are differenced at 12 months.

## eReferences

1. Box G, Jenkins G, Reinsel G. *Time Series Analysis: Forecasting and Control*. 4<sup>th</sup> ed. Hoboken, NJ: Wiley, 2008.
2. Chang I, Tiao GC, Chen C. Estimation of time series parameters in the presence of outliers. *Technometrics* 1988;30:193-204.
